# Supplementary material for: Exploration of the Drosophila buzzatii transposable element content suggests underestimation of repeats in Drosophila genomes
Source: PubMed Central journal article supplement (PMC4862133; doi:10.1186/s12864-016-2648-8), 2016-05-10
Supplement: 12864_2016_2648_MOESM2_ESM.pdf [file 12864_2016_2648_MOESM2_ESM.pdf]

## Additional file 2. Supplementary tables 1 to 12

**Table 1 D statistics of two samples Kolmogorov-Smirnov tests comparing the distributions of TE densities of the pairs *D. mojavensis* total**

| Total   | <i>D. mojavensis</i> |       |       |       |       |
|---------|----------------------|-------|-------|-------|-------|
| D-value | Chr2                 | Chr3  | Chr4  | Chr5  | Chr6  |
| ChrX    | 0.394                | 0.328 | 0.460 | 0.485 | 0.789 |
| Chr2    | -                    | 0.087 | 0.083 | 0.103 | 0.837 |
| Chr3    | -                    | -     | 0.145 | 0.165 | 0.807 |
| Chr4    | -                    | -     | -     | 0.051 | 0.822 |
| Chr5    | -                    | -     | -     | -     | 0.863 |

**Table 2 p-values of two samples Kolmogorov-Smirnov tests comparing the distributions of TE densities of the pairs *D. mojavensis* total**

| Total   | <i>D. mojavensis</i> |       |       |       |       |
|---------|----------------------|-------|-------|-------|-------|
| p-value | Chr2                 | Chr3  | Chr4  | Chr5  | Chr6  |
| ChrX    | 0.000                | 0.000 | 0.000 | 0.000 | 0.000 |
| Chr2    | -                    | 0.012 | 0.028 | 0.003 | 0.000 |
| Chr3    | -                    | -     | 0.000 | 0.000 | 0.000 |
| Chr4    | -                    | -     | -     | 0.467 | 0.000 |
| Chr5    | -                    | -     | -     | -     | 0.000 |

**Table 3 D statistics of two samples Kolmogorov-Smirnov tests comparing the distributions of TE densities of the pairs *D. buzzatii* total**

| Total   | <i>D. buzzatii</i> |       |       |       |       |
|---------|--------------------|-------|-------|-------|-------|
| D-value | Chr2               | Chr3  | Chr4  | Chr5  | Chr6  |
| ChrX    | 0.335              | 0.402 | 0.423 | 0.372 | 0.930 |
| Chr2    | -                  | 0.085 | 0.117 | 0.063 | 0.947 |
| Chr3    | -                  | -     | 0.042 | 0.056 | 0.944 |
| Chr4    | -                  | -     | -     | 0.064 | 0.946 |
| Chr5    | -                  | -     | -     | -     | 0.941 |

**Table 4** p-values of two samples Kolmogorov-Smirnov tests comparing the distributions of TE densities of the pairs *D. buzzatii* total

| Total   | <i>D. buzzatii</i> |       |       |       |       |
|---------|--------------------|-------|-------|-------|-------|
| p-value | Chr2               | Chr3  | Chr4  | Chr5  | Chr6  |
| ChrX    | 0.000              | 0.000 | 0.000 | 0.000 | 0.000 |
| Chr2    | -                  | 0.019 | 0.001 | 0.187 | 0.000 |
| Chr3    | -                  | -     | 0.734 | 0.353 | 0.000 |
| Chr4    | -                  | -     | -     | 0.247 | 0.000 |
| Chr5    | -                  | -     | -     | -     | 0.000 |

**Table 5** D statistics of two samples Kolmogorov-Smirnov tests comparing the distributions of TE densities of the pairs *D. mojavensis* Central + Distal

| Distal + Central | <i>D. mojavensis</i> |       |       |       |
|------------------|----------------------|-------|-------|-------|
| D-value          | Chr2                 | Chr3  | Chr4  | Chr5  |
| ChrX             | 0.420                | 0.362 | 0.507 | 0.520 |
| Chr2             | -                    | 0.088 | 0.111 | 0.117 |
| Chr3             | -                    | -     | 0.158 | 0.168 |
| Chr4             | -                    | -     | -     | 0.047 |

**Table 6** p-values of two samples Kolmogorov-Smirnov tests comparing the distributions of TE densities of the pairs *D. mojavensis* Distal + Central

| Distal + Central | <i>D. mojavensis</i> |       |       |       |
|------------------|----------------------|-------|-------|-------|
| p-value          | Chr2                 | Chr3  | Chr4  | Chr5  |
| ChrX             | 0.000                | 0.000 | 0.000 | 0.000 |
| Chr2             | -                    | 0.018 | 0.002 | 0.001 |
| Chr3             | -                    | -     | 0.000 | 0.000 |
| Chr4             | -                    | -     | -     | 0.645 |

**Table 7** D statistics of two samples Kolmogorov-Smirnov tests comparing the distributions of TE densities of the pairs *D. buzzatii* Distal + Central

| Distal + Central | <i>D. buzzatii</i> |       |       |       |
|------------------|--------------------|-------|-------|-------|
| D-value          | Chr2               | Chr3  | Chr4  | Chr5  |
| ChrX             | 0.354              | 0.431 | 0.474 | 0.404 |
| Chr2             | -                  | 0.095 | 0.144 | 0.080 |
| Chr3             | -                  | -     | 0.059 | 0.053 |
| Chr4             | -                  | -     | -     | 0.080 |

**Table 8** p-values of two samples Kolmogorov-Smirnov tests comparing the distributions of TE densities of the pairs *D. buzzatii* Distal + Central

| Distal + Central | <i>D. buzzatii</i> |       |       |       |
|------------------|--------------------|-------|-------|-------|
| p-value          | Chr2               | Chr3  | Chr4  | Chr5  |
| ChrX             | 0.000              | 0.000 | 0.000 | 0.000 |
| Chr2             | -                  | 0.011 | 0.000 | 0.063 |
| Chr3             | -                  | -     | 0.365 | 0.494 |
| Chr4             | -                  | -     | -     | 0.106 |

**Table 9** D statistics of two samples Kolmogorov-Smirnov tests comparing the distributions of TE densities of the pairs *D. mojavensis* Proximal

| Centromeric | <i>D. mojavensis</i> |       |       |       |
|-------------|----------------------|-------|-------|-------|
| D-value     | Chr2                 | Chr3  | Chr4  | Chr5  |
| ChrX        | 0.297                | 0.412 | 0.166 | 0.480 |
| Chr2        | -                    | 0.417 | 0.183 | 0.317 |
| Chr3        | -                    | -     | 0.400 | 0.683 |
| Chr4        | -                    | -     | -     | 0.383 |

**Table 10** p-values of two samples Kolmogorov-Smirnov tests comparing the distributions of TE densities of the pairs *D. mojavensis* Proximal

| Centromeric | <i>D. mojavensis</i> |       |       |       |
|-------------|----------------------|-------|-------|-------|
| p-value     | Chr2                 | Chr3  | Chr4  | Chr5  |
| ChrX        | 0.008                | 0.000 | 0.356 | 0.000 |
| Chr2        | -                    | 0.000 | 0.239 | 0.004 |
| Chr3        | -                    | -     | 0.000 | 0.000 |
| Chr4        | -                    | -     | -     | 0.000 |

**Table 11** D statistics of two samples Kolmogorov-Smirnov tests comparing the distributions of TE densities of the pairs *D. buzzatii* Proximal

| Centromeric | <i>D. buzzatii</i> |       |       |       |
|-------------|--------------------|-------|-------|-------|
| D-value     | Chr2               | Chr3  | Chr4  | Chr5  |
| ChrX        | 0.138              | 0.171 | 0.158 | 0.151 |
| Chr2        | -                  | 0.179 | 0.128 | 0.227 |
| Chr3        | -                  | -     | 0.121 | 0.207 |
| Chr4        | -                  | -     | -     | 0.224 |

**Table 12** p-values of two samples Kolmogorov-Smirnov tests comparing the distributions of TE densities of the pairs *D. buzzatii* Proximal

| Centromeric | <i>D. buzzatii</i> |       |       |       |
|-------------|--------------------|-------|-------|-------|
| p-value     | Chr2               | Chr3  | Chr4  | Chr5  |
| ChrX        | 0.609              | 0.337 | 0.437 | 0.498 |
| Chr2        | -                  | 0.280 | 0.694 | 0.083 |
| Chr3        | -                  | -     | 0.765 | 0.146 |
| Chr4        | -                  | -     | -     | 0.093 |
